# Supplementary material for: Functional Imaging and Inhibitor Screening of Human Pancreatic Lipase by a Resorufin-Based Fluorescent Probe
Source: MDPI journal article supplement (doi:10.3390/bios13020283), 2023-02-16
Supplement: s1 [file s1]

## Supplementary Materials

*for*

### Functional imaging and inhibitor screening of human pancreatic lipase by a resorufin-based fluorescent probe

Fan-Bin Hou<sup>1,†</sup>, Na Zhang<sup>2,†</sup>, Guang-Hao Zhu<sup>1</sup>, Yu-Fan Fan<sup>1</sup>, Meng-Ru Sun<sup>1</sup>,  
Liang-Liang Nie<sup>3,4</sup>, Guang-Bo Ge<sup>1</sup>, Yue-Juan Zheng<sup>3,\*</sup>, Ping Wang<sup>1,\*</sup>

<sup>1</sup> Shanghai Frontiers Science Center of TCM Chemical Biology; Institute of Interdisciplinary Integrative Medicine Research, Shanghai University of Traditional Chinese Medicine, Shanghai, 201203, China

<sup>2</sup> Department of Biology, Philipps University, Karl-von-Frisch-Straße 8, Marburg, 35043, Germany

<sup>3</sup> The Research Center for Traditional Chinese Medicine, Shanghai Institute of Infectious Diseases and Biosecurity, Shanghai University of Traditional Chinese Medicine, Shanghai, 201203, China

<sup>4</sup> School of Pharmaceutical Science, Liaoning University, Shenyang 110036, China

\* Correspondence: pwang@shutcm.edu.cn (P.W.), zhengyj@shutcm.edu.cn (Y.-J. Z.)

† These authors contributed equally to this work.

### **Recombinant expression and purification of hPL**

The human pancreatic cDNA was cloned into the pTT5 vector with the N-terminal mouse IgG  $\kappa$  chain signal peptide and C-terminal His10-tag. Freestyle 293-F cells (Invitrogen) were cultured in SMM 293T-II medium (Sino Biological Inc.) at 37 °C, 130 rpm under 5% CO<sub>2</sub>. The pTT5 containing human pancreatic lipase cDNA plasmid was pre-mixed with PEI MAX 40K (Polysciences) for 30 min before transfection. Transfection was started by adding plasmid-PEI MAX 40K mixture when the cell density reached  $2.0 \times 10^6$  cells/mL. After 72 h, the transfected cells were centrifuged at 1000 rpm for 10 min and the conditioned medium was collected. The conditioned medium was loaded on the Ni Sepharose excel resin (GE Healthcare). The resin was washed with wash buffer 1 containing 25 mM Tris-HCl, pH 7.4, 150 mM NaCl, 1 mM CaCl<sub>2</sub>, 2 mM imidazole. The protein was eluted with elute buffer 1 containing 25 mM Tris-HCl, pH 7.4, 150 mM NaCl, 1 mM CaCl<sub>2</sub>, 200 mM imidazole. The eluted protein was diluted 10 times with a buffer (25 mM Tris-HCl, pH 8.0, 150 mM NaCl, 1 mM CaCl<sub>2</sub>) and incubated with Ni-NTA agarose (Qiagen) for further purification. The agarose was washed with wash buffer 2 containing 25 mM Tris-HCl, pH 8.0, 150 mM NaCl, 1 mM CaCl<sub>2</sub>, 20 mM imidazole. Then the protein was eluted with elute buffer 2 containing 25 mM Tris-HCl, pH 8.0, 150 mM NaCl, 1 mM CaCl<sub>2</sub>, 300 mM imidazole. The human pancreatic lipase-containing fractions were concentrated using a 10 kDa molecular weight cut-off (MWCO) concentrator (Millipore). The concentrated sample was purified on a Superdex 200 10/300 GL column (GE Healthcare) equilibrated in protein storage buffer (25 mM Tris-HCl, pH 7.4, 150 mM NaCl, 1 mM CaCl<sub>2</sub>).

### **Preparation of S9 fractions from monkey tissues and AR42J cells**

Monkey pancreas samples were washed with PBS solution (0.1 M, pH=7.4) containing EDTA (1.0 mM). The weighed samples were cut into pieces in PBS solution. These fragments were ground using a fully automated sample freezer grinder (60 Hz, 60 s twice). The homogenate of the fragments was centrifuged at 9000 G for 20 min to obtain the S9 fraction. The cells were cultured in the medium containing fetal bovine serum to 80% density. The cells were broken with a cell crusher, and the supernatant (S9) was collected after 9000g centrifuge for 20min.

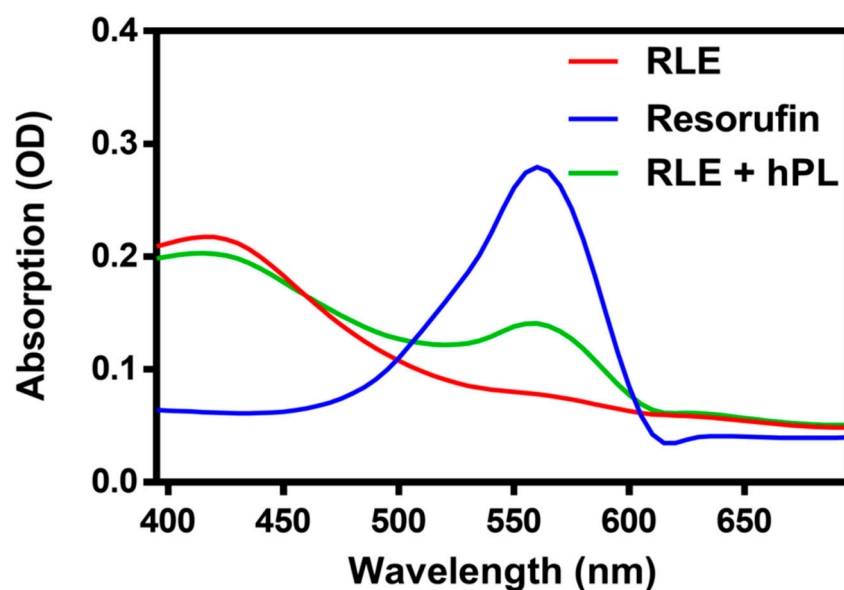

**Figure S1.** The change in absorption spectrum of **RLE** (20  $\mu$ M) in presence of hPL (10  $\mu$ g/mL).

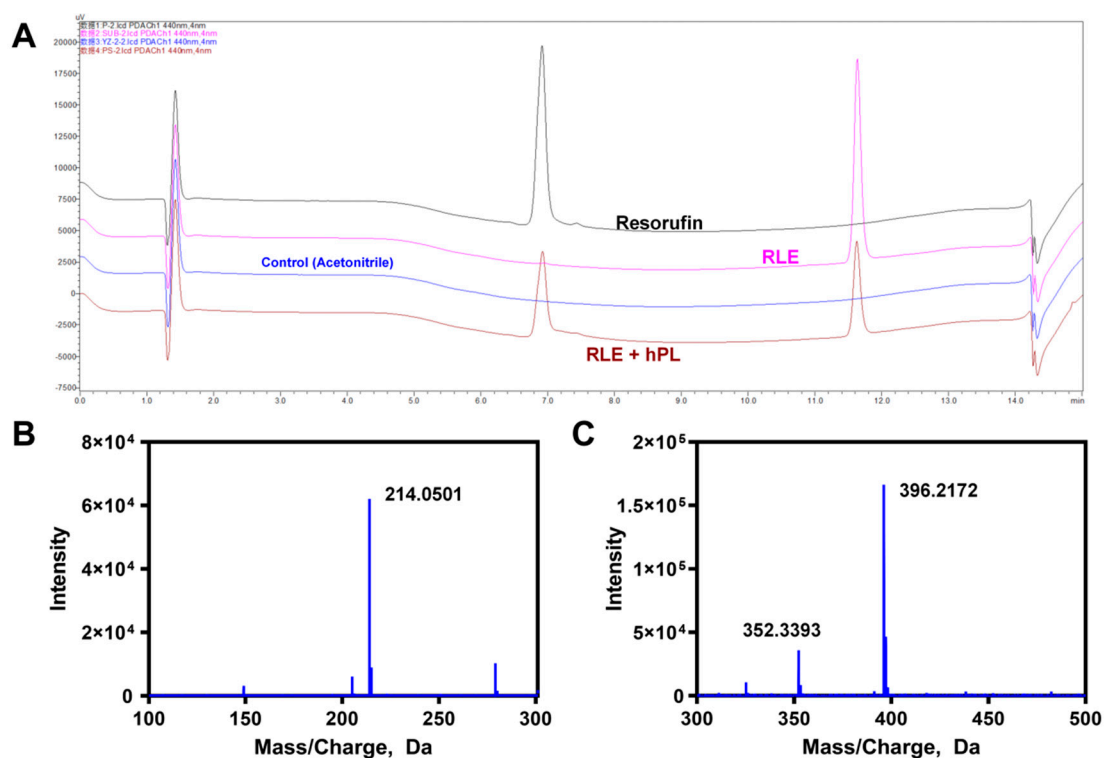

**Figure S2.** (A) Representative LC-UV chromatograms of **RLE** incubation samples at 37  $^{\circ}$ C, UV detector was set at 440 nm. Mass spectra of **RLE** with the quasi-molecular ion peak  $m/z$  = 396.2172 (C), and its hydrolytic product **Resorufin** with the quasi-molecular ion peak  $m/z$  = 214.0501 (B) monitored under positive mode.

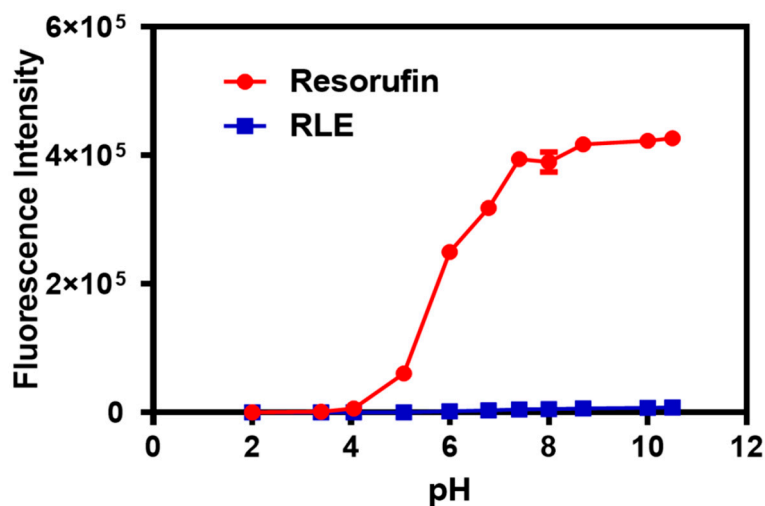

**Figure S3.** The effects of pH values on the fluorescence intensity of RLE and its metabolite Resorufin (5  $\mu$ M), PMT Gain = 500 volts.

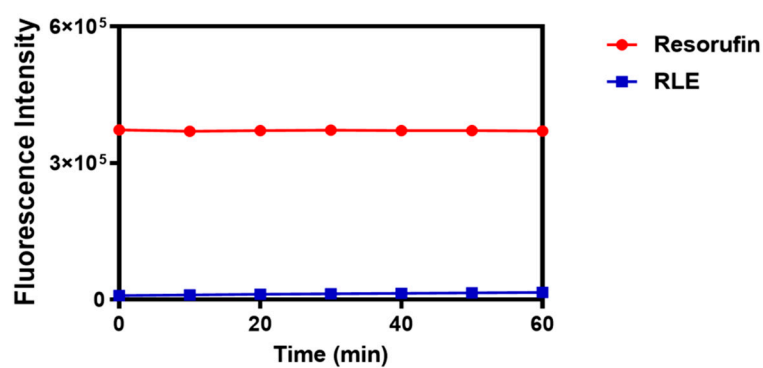

**Figure S4.** The photostability of RLE (5  $\mu$ M) and Resorufin (5  $\mu$ M), following continuous illumination at 550 nm for different time, PMT Gain = 500 volts.

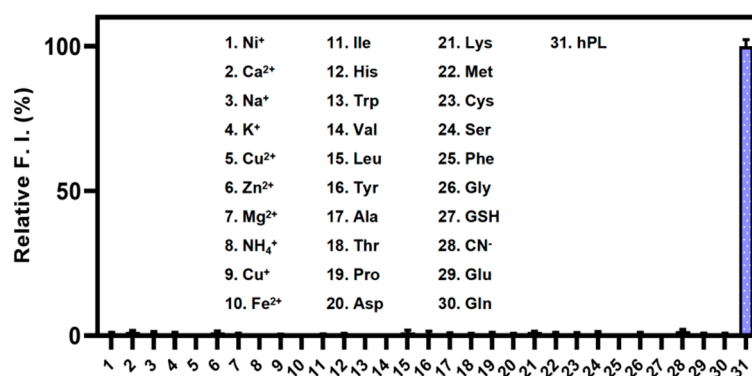

**Figure S5.** Fluorescence responses of RLE (5  $\mu$ M) to various analytes in aqueous solution. Relative fluorescence intensity (%) = Fluorescence intensity of adding analytes / Fluorescence intensity of hPL.

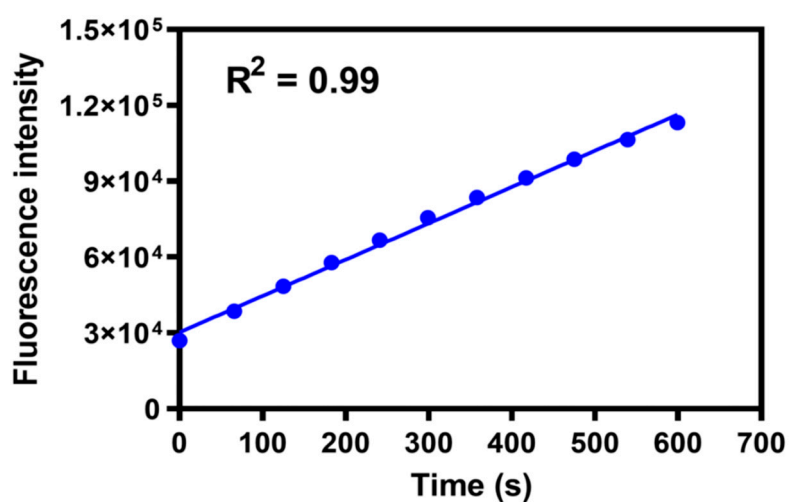

**Figure S6.** The Linear in fluorescence intensity of **RLE** (5  $\mu\text{M}$ ) over time upon addition of hPL (1  $\mu\text{g/mL}$ ) in buffer at 37  $^{\circ}\text{C}$ .

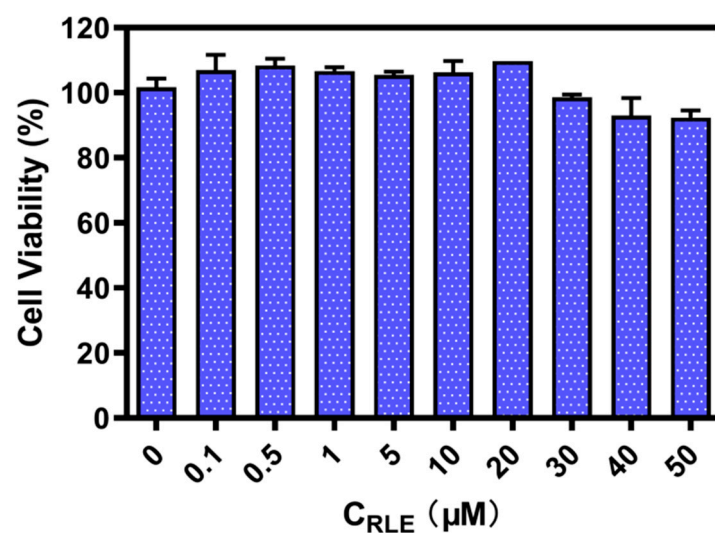

**Figure S7.** The cytotoxicity of **RLE** in AR42J.

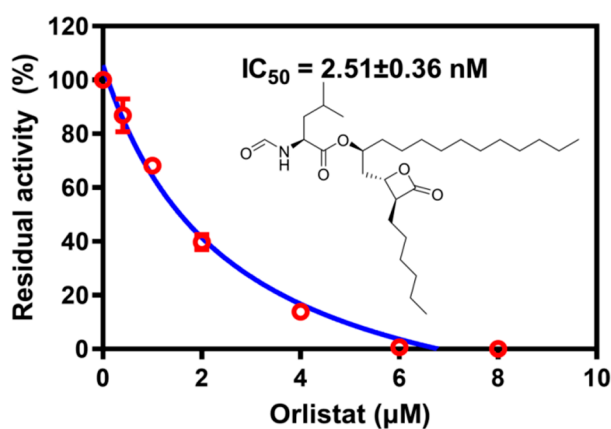

**Figure S8.** Dose-inhibition curves of orlistat against hPL catalysed **RLE** hydrolysis. All data were expressed as mean  $\pm$  SD.

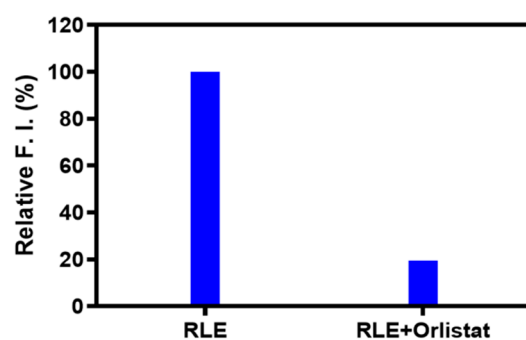

**Figure S9.** Graphical quantification of average fluorescence intensity of PL activities by **RLE** in AR42J cells.

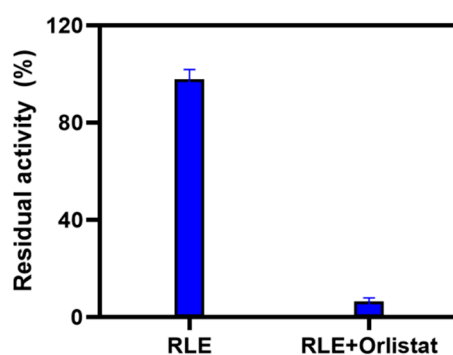

**Figure S10.** Inhibitory effect of orlistat (25  $\mu$ M) on PL catalyzed **RLE** hydrolysis in AR42J cells S9.

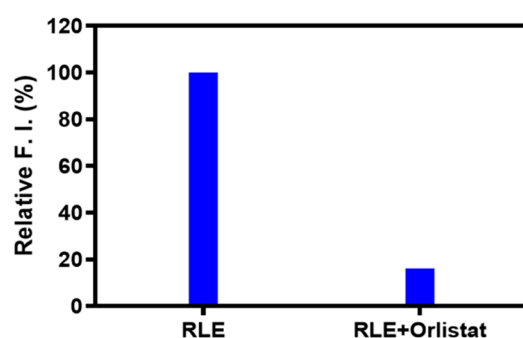

**Figure S11.** Graphical quantification of average fluorescence intensity of PL activities by **RLE** in Monkey pancreatic tissues.

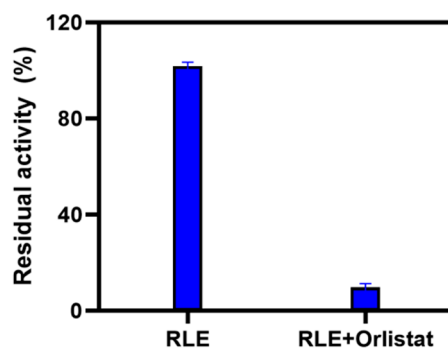

**Figure S12.** Inhibitory effect of orlistat (25  $\mu$ M) on PL catalyzed **RLE** hydrolysis in monkey pancreas S9.



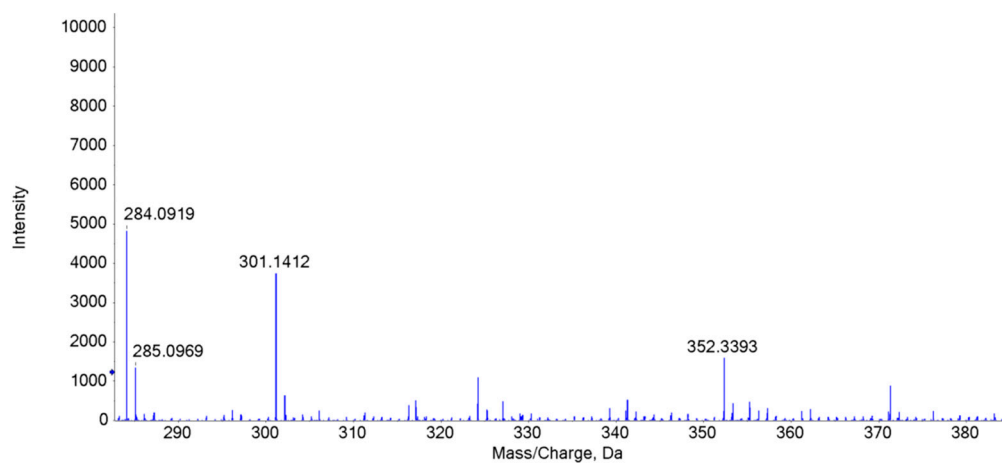

**Figure S15.** HRMS spectrum of compound **Resorufin butyryl ester**.

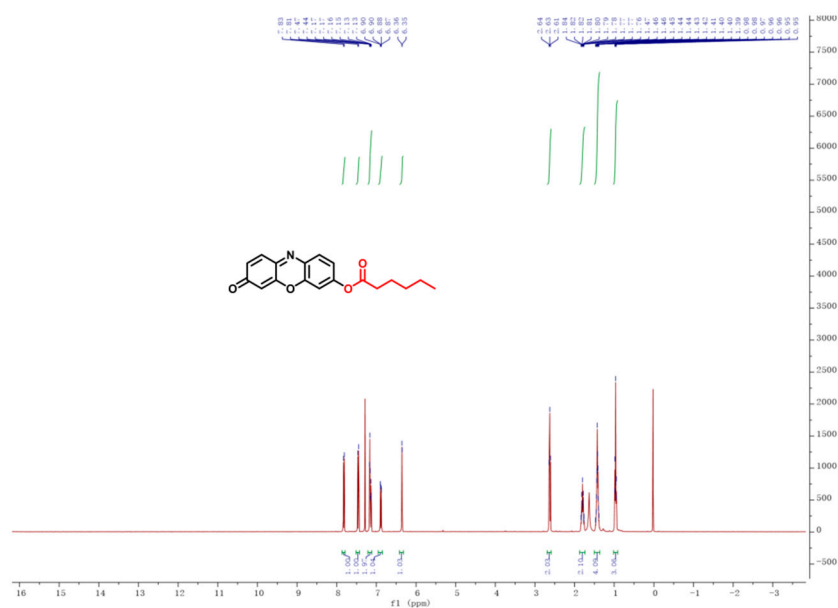

**Figure S16.** <sup>1</sup>H NMR spectra of compound **Resorufin hexanoyl ester**.

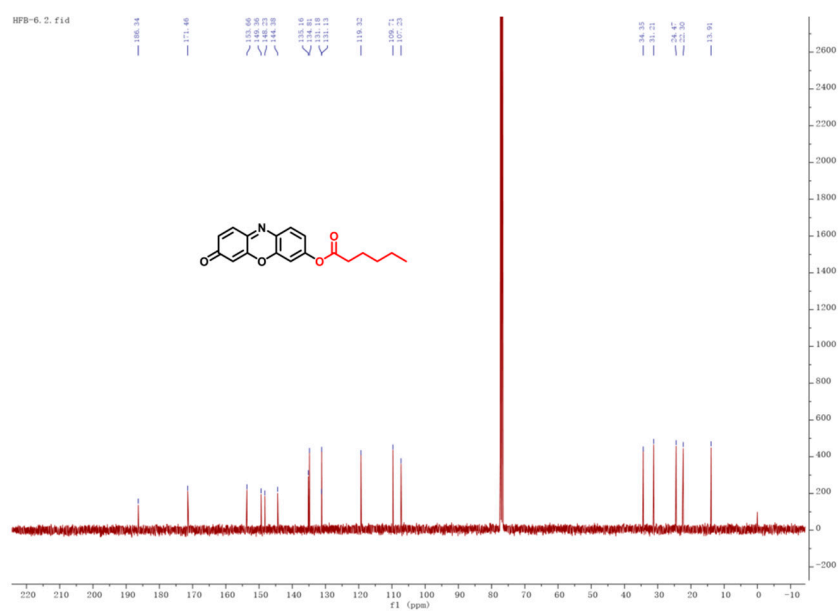

**Figure S17.** <sup>13</sup>C NMR spectra of compound **Resorufin hexanoyl ester**.



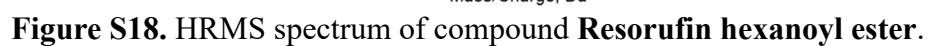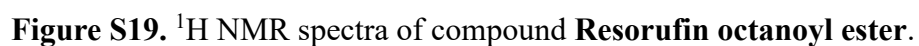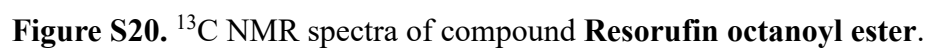

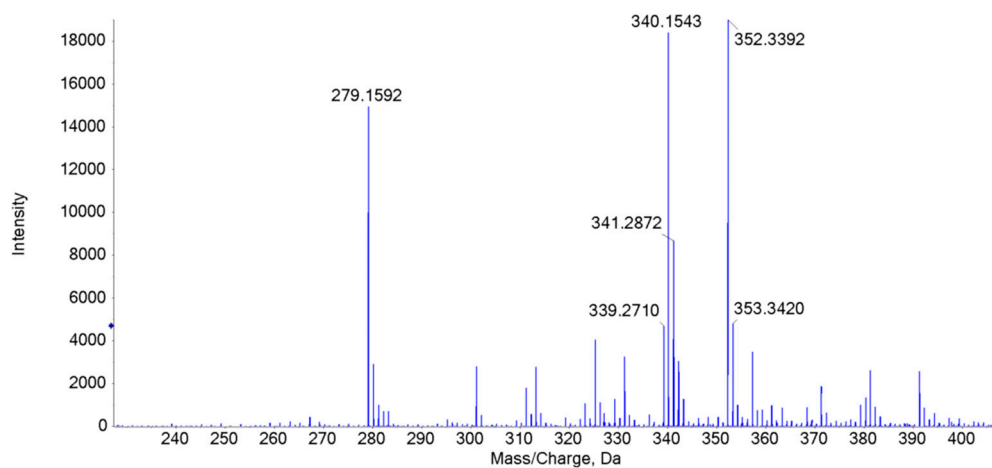

**Figure S21.** HRMS spectrum of compound **Resorufin octanoyl ester**.

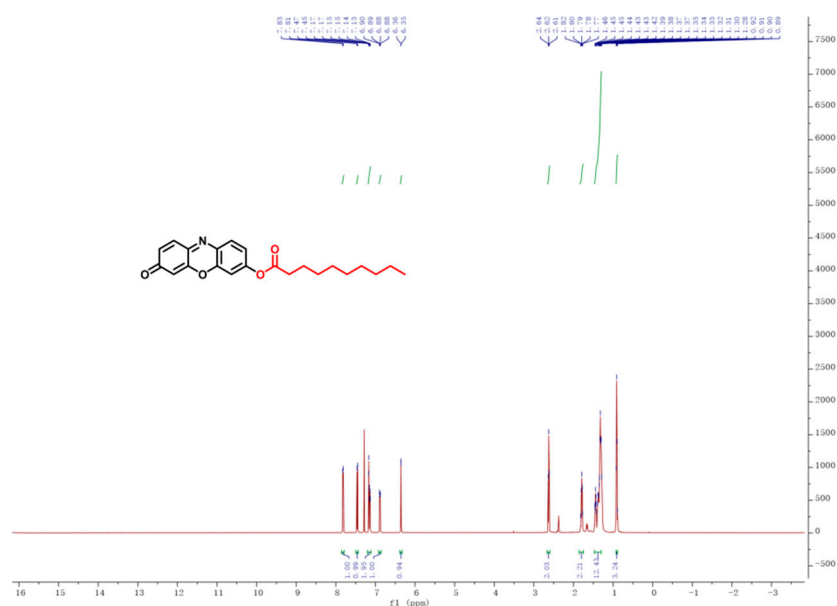

**Figure S22.** <sup>1</sup>H NMR spectra of compound **Resorufin decanoyl ester**.

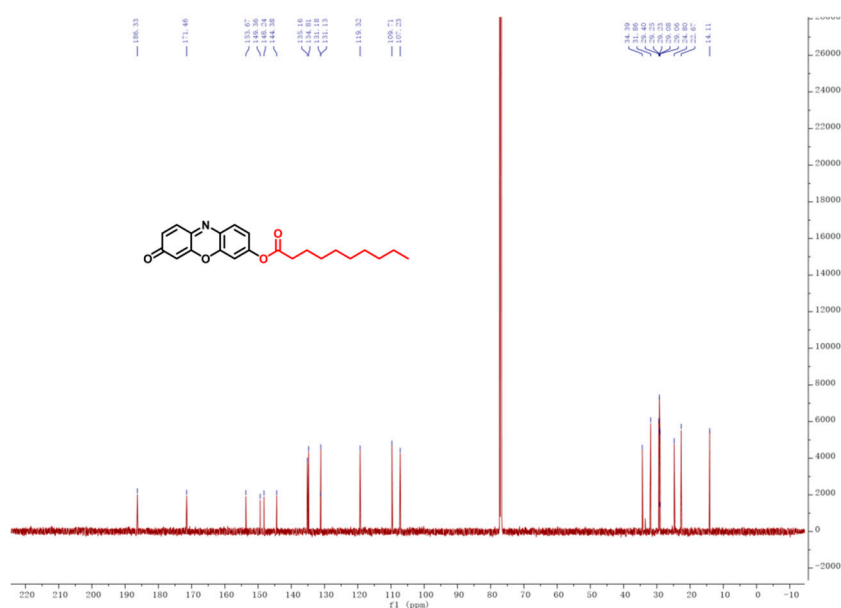

**Figure S23.** <sup>13</sup>C NMR spectra of compound **Resorufin decanoyl ester**.

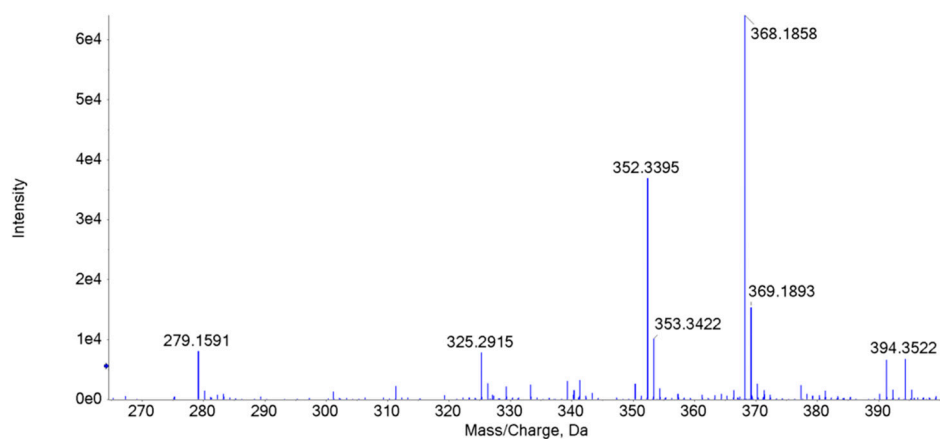

**Figure S24.** HRMS spectrum of compound **Resorufin decanoyl ester**.

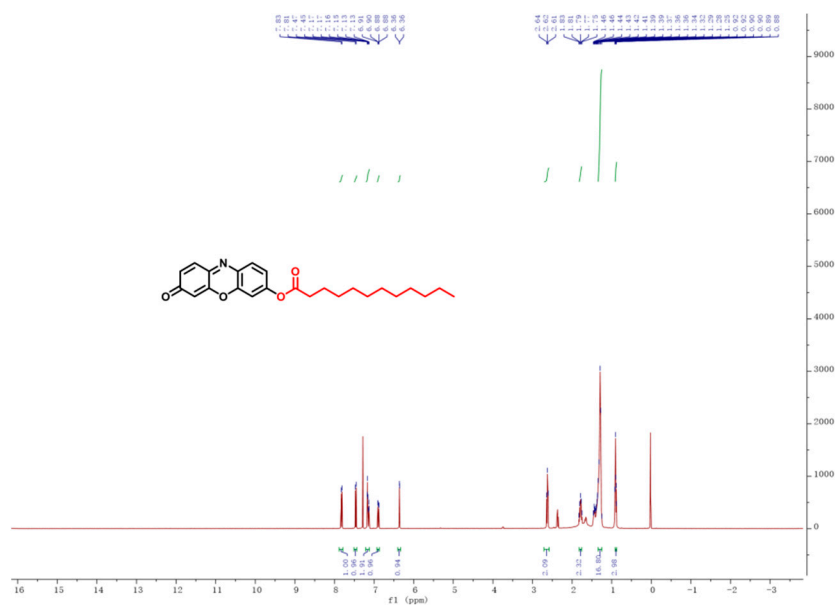

**Figure S25.** <sup>1</sup>H NMR spectra of compound **RLE**.

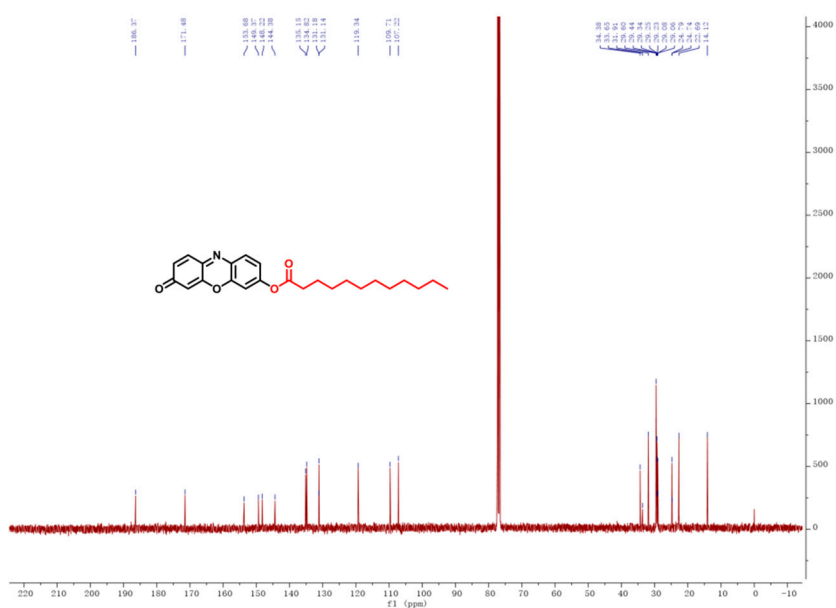

**Figure S26.** <sup>13</sup>C NMR spectra of compound **RLE**.

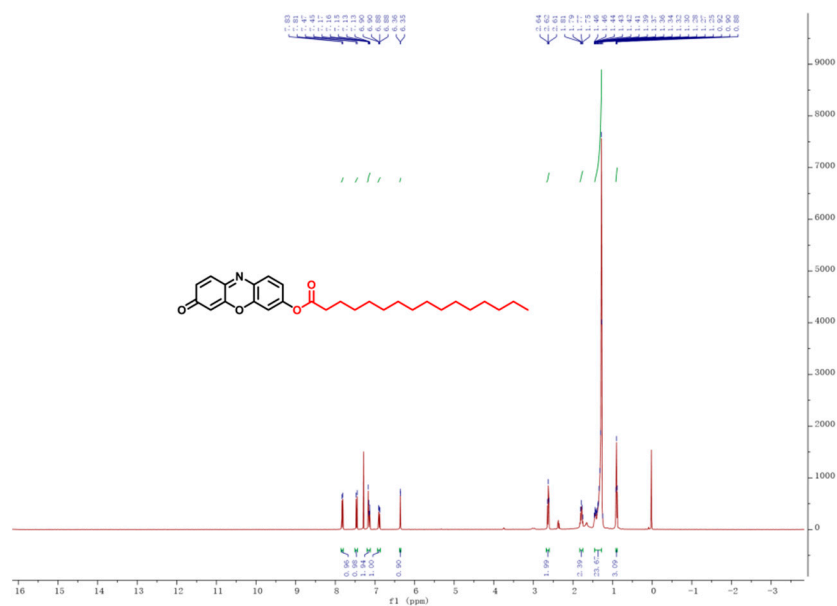

Figure S27.  $^1\text{H}$  NMR spectra of compound **Resorufin palmitoyl ester**.

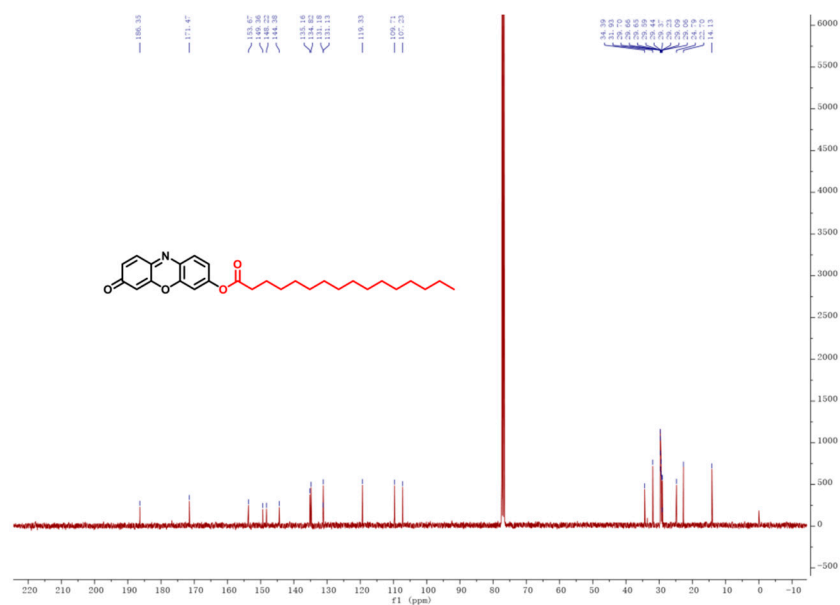

Figure S28.  $^{13}\text{C}$  NMR spectra of compound **Resorufin palmitoyl ester**.

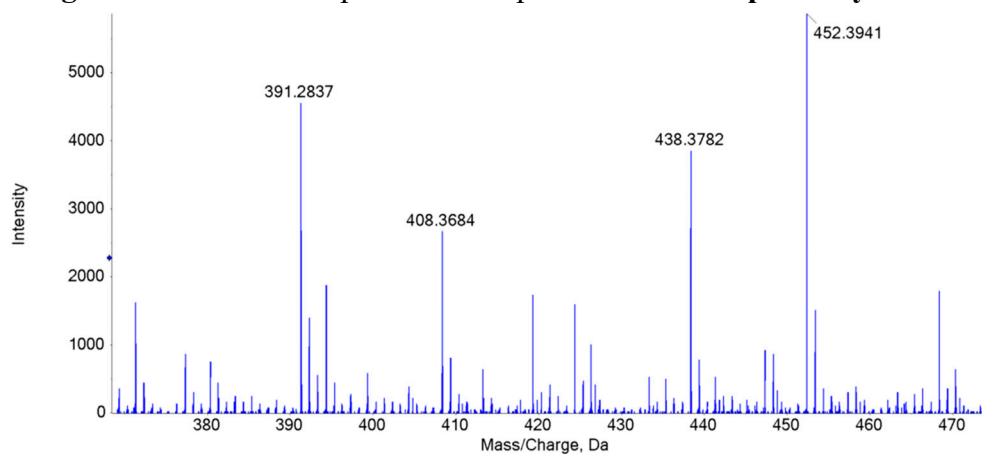

Figure S29. HRMS spectrum of compound **Resorufin palmitoyl ester**.



**Table S1.** The reported fluorescent substrates for sensing pancreatic lipase.

| Fluorescent substrate                                                               | Target enzyme | Detection conditions                                                         | LOD                    | Ref.       |
|-------------------------------------------------------------------------------------|---------------|------------------------------------------------------------------------------|------------------------|------------|
| 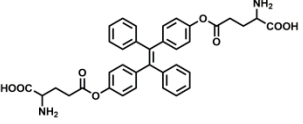   | PPL           | $\lambda_{\text{ex}}=360 \text{ nm}$<br>$\lambda_{\text{em}}=453 \text{ nm}$ | 0.13 U/L               | [1]        |
|    | PPL           | $\lambda_{\text{ex}}=350 \text{ nm}$<br>$\lambda_{\text{em}}=420 \text{ nm}$ | 0.1 mg/mL              | [2]        |
|    | pPL           | $\lambda_{\text{ex}}=380 \text{ nm}$<br>$\lambda_{\text{em}}=562 \text{ nm}$ | 0.05 U/L               | [3]        |
|    | hPL           | $\lambda_{\text{ex}}=360 \text{ nm}$<br>$\lambda_{\text{em}}=460 \text{ nm}$ | N.D.                   | [4]        |
|   | hPL           | $\lambda_{\text{ex}}=600 \text{ nm}$<br>$\lambda_{\text{em}}=660 \text{ nm}$ | 0.40 $\mu\text{g/mL}$  | [5]        |
|  | hPL           | $\lambda_{\text{ex}}=570 \text{ nm}$<br>$\lambda_{\text{em}}=590 \text{ nm}$ | 0.369 $\mu\text{g/mL}$ | This study |

**Table S2.** Residual activity of 94 natural products derived from herbs (10  $\mu\text{M}$ , final concentration) against hPL-catalyzed **RLE** hydrolysis.

| No. | Compound                      | MW      | Residue activity (%) |
|-----|-------------------------------|---------|----------------------|
| a1  | Ctrl (DMSO only)              | -       | 100                  |
| a2  | Orlistat (positive inhibitor) | 477.04  | 5.33                 |
| a3  | Ginkgetin                     | 566.51  | 39.42                |
| a4  | Loureirin A                   | 286.32  | 67.52                |
| a5  | Loureirin B                   | 316.35  | 79.89                |
| a6  | Licochalcone D                | 354.4   | 80.45                |
| a7  | Licochalcone B                | 286.28  | 58.04                |
| a8  | Isorhynchophylline            | 384.47  | 87.99                |
| a9  | Apigenin                      | 270.24  | 102.46               |
| a10 | Palmatine chloride            | 387.86  | 87.01                |
| a11 | Wogonin                       | 284.26  | 106.17               |
| a12 | Genistein                     | 270.24  | 106.48               |
| b1  | Dehydrocorydaline             | 366.436 | 123.69               |

|     |                         |           |        |
|-----|-------------------------|-----------|--------|
| b2  | Coptisine chloride      | 355.77    | 113.58 |
| b3  | Catharanthine           | 336.43    | 81.11  |
| b4  | Liquiritin              | 418.4     | 105.77 |
| b5  | Formononetin            | 268.26    | 104.25 |
| b6  | Berbamine Hydrochloride | 665.65    | 69.86  |
| b7  | Khasianine              | 721.93    | 102.50 |
| b8  | Pimpinellin             | 246.22    | 61.25  |
| b9  | Oxysophocarpine         | 262.35    | 98.58  |
| b10 | Obacunon                | 454.51    | 79.60  |
| b11 | Ginkgolide C            | 440.4     | 106.22 |
| b12 | Ginkgolide B            | 424.4     | 120.07 |
| c1  | Ginkgolide A            | 408.4     | 125.97 |
| c2  | Baicalein               | Baicalein | 48.80  |
| c3  | Alantolactone           | 232.32    | 61.11  |
| c4  | Isoalantolactone        | 232.32    | 70.02  |
| c5  | Andrographolide         | 350.45    | 70.38  |
| c6  | Myricitrin              | 464.38    | 91.12  |
| c7  | Dihydromyricetin        | 320.25    | 95.62  |
| c8  | TGaxifolin              | 304.25    | 97.17  |
| c9  | <i>p</i> -Coumaric acid | 164.16    | 98.98  |
| c10 | Dihydrokaempferol       | 288.25    | 109.31 |
| c11 | Sinomenine              | 329.39    | 101.42 |
| c12 | Tiapride                | 328.43    | 108.20 |
| d1  | Dehydroandrographolide  | 332.43    | 89.55  |
| d2  | Esculetin               | Esculetin | 86.12  |
| d3  | Quercetin               | 302.24    | 47.29  |
| d4  | <u>Celastr</u> ol       | 450.61    | 84.16  |
| d5  | Hydroxysafflor yellow A | 612.54    | 76.59  |
| d6  | Orientin                | 448.38    | 76.06  |
| d7  | Bergapten               | 216.19    | 54.11  |
| d8  | Isoimperatorin          | 270.28    | 72.90  |
| d9  | Curcumin                | 368.38    | 75.83  |
| d10 | Praeruptorin E          | 428.47    | 87.81  |
| d11 | Imperatorin             | 270.28    | 75.61  |
| d12 | 8-Methoxypsoralen       | 216.19    | 90.65  |
| e1  | trans-Cinnamic acid     | 148.16    | 72.50  |
| e2  | Salvigenin              | 328.32    | 75.70  |
| e3  | Myricetin               | 318.24    | 56.43  |
| e4  | Herbacetin              | 302.24    | 83.59  |
| e5  | Oridonin                | 364.44    | 66.82  |

|     |                                                                                                                                                               |         |        |
|-----|---------------------------------------------------------------------------------------------------------------------------------------------------------------|---------|--------|
| e6  | Limonin                                                                                                                                                       | 470.51  | 85.30  |
| e7  | Benzyl cinnamate                                                                                                                                              | 238.28  | 74.62  |
| e8  | Coptisine                                                                                                                                                     | 320.32  | 106.42 |
| e9  | Irisflorentin                                                                                                                                                 | 386.35  | 66.38  |
| e10 | Coptisine                                                                                                                                                     | 320.32  | 101.77 |
| e11 | 4H-1-Benzopyran-4-one,<br>3-[[6- <i>O</i> -(6-deoxy- $\alpha$ -L-mannopyranosyl)- $\beta$ -D-glucopyranosyl]oxy]-5,7-d<br>ihydroxy-2-(3,4,5-trihydroxyphenyl) | 626.52  | 116.73 |
| e12 | <u>Astragalin</u>                                                                                                                                             | 448.38  | 107.88 |
| f1  | Nobiletin                                                                                                                                                     | 402.39  | 80.44  |
| f2  | Homoharringtonine                                                                                                                                             | 545.63  | 74.77  |
| f3  | Z-Ligustilide                                                                                                                                                 | 190.24  | 83.60  |
| f4  | 3-N-butyl-4,5-dihydrophthalide                                                                                                                                | 192.25  | 75.65  |
| f5  | Isorhamnetin-3-glucoside                                                                                                                                      | 478.4   | 93.93  |
| f6  | Xanthohumol                                                                                                                                                   | 354.4   | 81.19  |
| f7  | Phloretin                                                                                                                                                     | 274.27  | 81.23  |
| f8  | Xanthohumol L                                                                                                                                                 | 370.4   | 100.78 |
| f9  | Phlorizin dihydrate                                                                                                                                           | 436.41  | 85.09  |
| f10 | Berberrubine                                                                                                                                                  | 357.79  | 86.09  |
| f11 | Shikonin                                                                                                                                                      | 288.31  | 107.55 |
| f12 | Toosendanin                                                                                                                                                   | 574.62  | 72.37  |
| g1  | Methyl caffeate                                                                                                                                               | 194.18  | 72.74  |
| g2  | 2-(3,4-Dihydroxyphenyl)-3,6,7-trihydroxy-5-methoxy-4H-1-benzopyran<br>-4-one                                                                                  | 332.26  | 59.87  |
| g3  | Caffeic acid                                                                                                                                                  | 180.16  | 71.45  |
| g4  | Sesamol                                                                                                                                                       | 138.12  | 103.95 |
| g5  | <u>phytolaccagenin</u>                                                                                                                                        | 532.70  | 85.42  |
| g6  | Pinocembrin                                                                                                                                                   | 256.25  | 91.25  |
| g7  | Isovitexin                                                                                                                                                    | 432.38  | 79.86  |
| g8  | Methylophiopogonanone A                                                                                                                                       | 342.34  | 80.44  |
| g9  | Isoginkgetin                                                                                                                                                  | 566.51  | 54.78  |
| g10 | Ipriflavone                                                                                                                                                   | 280.32  | 84.50  |
| g11 | Timosaponin A-III                                                                                                                                             | 740.92  | 95.12  |
| g12 | Salvianolic acid                                                                                                                                              | 494.45  | 96.06  |
| h1  | Lysionotin                                                                                                                                                    | 344.31  | 84.30  |
| h2  | Calycosin 7- <i>O</i> -glucoside                                                                                                                              | 446.41  | 84.02  |
| h3  | Cassiaside                                                                                                                                                    | 404.36  | 81.67  |
| h4  | Platycodin D                                                                                                                                                  | 1225.34 | 89.14  |
| h5  | Alpinetin                                                                                                                                                     | 270.28  | 107.78 |
| h6  | Glycitin                                                                                                                                                      | 446.41  | 99.85  |



|            |                                    |               |             |
|------------|------------------------------------|---------------|-------------|
| h7         | Epmedin C                          | 822.8         | 81.94       |
| <b>h8</b>  | <b>Procyanidin</b>                 | <b>594.52</b> | <b>5.72</b> |
| <b>h9</b>  | <b>Carnosol</b>                    | <b>330.42</b> | <b>4.20</b> |
| <b>h10</b> | <b>Sciadopitysin</b>               | <b>580.54</b> | <b>5.25</b> |
| h11        | 5,7-Dihydrox -4'-methoxyisoflavone | 284.26        | 100.90      |
| h12        | Morin hydrate                      | 320.25        | 96.10       |

**Table S3.** Residual activity of 94 drugs (10  $\mu$ M, final concentration) against hPL-catalyzed **RLE** hydrolysis.

| No.       | Compound                      | MW            | Residue activity (%) |
|-----------|-------------------------------|---------------|----------------------|
| a1        | Ctrl (DMSO only)              | -             | 100                  |
| a2        | Orlistat (positive inhibitor) | 477.04        | 5.31                 |
| a3        | Etoposide                     | 588.56        | 65.05                |
| a4        | Crizotinib                    | 450.34        | 85.14                |
| a5        | Digoxin                       | 780.95        | 99.51                |
| a6        | Quinidine                     | 324.42        | 100.77               |
| a7        | Boldenone                     | 286.41        | 66.33                |
| a8        | Omeprazole                    | 345.42        | 94.84                |
| a9        | Clopidogrel sulfate           | 405.87        | 90.49                |
| a10       | Celecoxib                     | 381.37        | 90.67                |
| a11       | diclofenzc                    | 296.10        | 97.62                |
| a12       | Eslicarbazepine               | 254.28        | 103.44               |
| b1        | Gemcitabine                   | 263.20        | 105.06               |
| b2        | Glimepiride                   | 490.62        | 90.05                |
| b3        | Prednisolone                  | 360.45        | 82.34                |
| b4        | Lamotrigine                   | 256.09        | 84.88                |
| b5        | Amlodipine                    | 408.88        | 85.85                |
| b6        | Nimodipine                    | 418.44        | 98.69                |
| b7        | Sulbactam sodium              | 257.24        | 88.89                |
| <b>b8</b> | <b>Ivermectin</b>             | <b>875.09</b> | <b>3.05</b>          |
| b9        | Cloxacillin benzathine        | 676.23        | 72.17                |
| b10       | Nisoldipine                   | 388.41        | 75.08                |
| b11       | Unii-33Y9anm545               | 473.99        | 96.93                |
| b12       | Methylprednisolone            | 374.47        | 44.82                |
| c1        | Megestrol acetate             | 384.51        | 44.82                |
| c2        | Felodipine                    | 384.25        | 93.02                |
| c3        | Indometacin                   | 357.79        | 102.95               |
| c4        | Clozapine                     | 326.82        | 97.86                |

|           |                                   |               |              |
|-----------|-----------------------------------|---------------|--------------|
| c5        | Lovastatin                        | 404.54        | 80.96        |
| c6        | Loratadine                        | 382.88        | 96.14        |
| c7        | Midazolam                         | 325.77        | 96.73        |
| c8        | Metoprolol tartrate               | 684.82        | 135.23       |
| c9        | Furosemide                        | 330.74        | 100.00       |
| c10       | Probenecid                        | 285.36        | 93.75        |
| c11       | Metronidazole                     | 171.15        | 78.49        |
| c12       | Sorafenib tosylate                | 637.03        | 56.84        |
| <b>d1</b> | <b>Raloxifene</b>                 | <b>473.58</b> | <b>4.05</b>  |
| d2        | Zidovudine                        | 283.24        | 73.04        |
| d3        | Dasatinib                         | 488.01        | 91.97        |
| d4        | Reserpine                         | 608.69        | 94.24        |
| d5        | Warfarin sodium                   | 330.31        | 84.05        |
| d6        | Simvastatin                       | 418.57        | 84.18        |
| d7        | Atazanavir                        | 704.86        | 79.92        |
| d8        | Diphenhydramine Hydrochloride     | 291.82        | 88.58        |
| d9        | 3-Hydroxytyramine hydrochloride   | 189.64        | 86.11        |
| d10       | Terbinafine Hydrochloride         | 327.89        | 91.01        |
| d11       | CeftazidiMe                       | 546.58        | 118.41       |
| d12       | Alprazolam                        | 308.76        | 68.13        |
| e1        | Carbamazepine                     | 236.27        | 104.15       |
| e2        | Oseltamivir phosphate             | 410.40        | 101.77       |
| e3        | Linagliptin                       | 472.54        | 108.93       |
| e4        | Ibuprofen                         | 206.28        | 103.68       |
| e5        | Gestrinone                        | 308.41        | 66.72        |
| e6        | Nitrendipine                      | 360.36        | 92.86        |
| e7        | Vandetanib                        | 475.35        | 104.95       |
| e8        | Naproxen                          | 230.26        | 116.02       |
| e9        | bupropion hydrochloride           | 276.20        | 120.79       |
| e10       | AZD-9291                          | 499.61        | 92.69        |
| e11       | Cyclopropyl 2-fluorobenzyl ketone | 178.20        | 117.10       |
| e12       | Benorilate                        | 313.30        | 76.99        |
| <b>f1</b> | <b>Sorafenib tosylate</b>         | <b>637.03</b> | <b>44.04</b> |
| f2        | Amikacin                          | 585.60        | 73.77        |
| f3        | Diffunisal                        | 250.20        | 118.03       |
| f4        | Donepezil Hydrochloride           | 415.95        | 100.82       |
| f5        | Oxaprozin                         | 293.32        | 81.83        |
| f6        | Hydrocortisone                    | 362.47        | 56.27        |
| f7        | Cephalexin                        | 347.39        | 109.58       |
| f8        | Ofloxacin                         | 361.37        | 87.95        |

|     |                             |         |        |
|-----|-----------------------------|---------|--------|
| f9  | Etonogestrel                | 324.46  | 62.97  |
| f10 | Irinotecan                  | 586.68  | 105.25 |
| f11 | Dextromethorphan            | 271.4   | 89.61  |
| f12 | Terbutaline                 | 225.28  | 108.89 |
| g1  | <u>Cimetidine</u>           | 252.34  | 111.11 |
| g2  | <u>Ritonavir</u>            | 720.94  | 97.04  |
| g3  | Menthofuran                 | 150.22  | 108.33 |
| g4  | Rivaroxaban                 | 435.88  | 118.66 |
| g5  | Polymyxin B                 | 1203.5  | 52.81  |
| g6  | Imipramine hydrochloride    | 316.87  | 92.51  |
| g7  | Fenofibrate                 | 360.83  | 94.68  |
| g8  | Medroxyprogesterone Acetate | 386.52  | 68.77  |
| g9  | Fenoprofen                  | 242.27  | 91.13  |
| g10 | Amiloride hydrochloride     | 266.09  | 109.84 |
| g11 | Vancomycin                  | 1449.25 | 96.04  |
| g12 | Ethionamide                 | 166.24  | 91.71  |
| h1  | Sulfamethoxazole            | 253.28  | 98.83  |
| h2  | Hydrochlorothiazide         | 297.74  | 99.42  |
| h3  | Ezetimibe                   | 409.43  | 119.27 |
| h4  | Linezolid                   | 337.35  | 91.81  |
| h5  | Tenofovir disoproxil        | 519.44  | 91.86  |
| h6  | 4-Cholesten-3-one           | 384.64  | 77.59  |
| h7  | Bambuterol hydrochloride    | 403.90  | 93.23  |
| h8  | Cyclophosphamide            | 261.09  | 91.59  |
| h9  | <u>Entinostat</u>           | 376.41  | 102.02 |
| h10 | Testosterone propionate     | 344.50  | 65.37  |
| h11 | Genipin                     | 226.23  | 99.28  |
| h12 | Remdesivir                  | 602.58  | 98.67  |

## References

- [1] Shi, J., Deng, Q., Wan, C., Zheng, M., Huang, F., & Tang, B. (2017). Fluorometric probing of the lipase level as acute pancreatitis biomarkers based on interfacially controlled aggregation-induced emission (AIE). *Chemical science*, 8(9), 6188–6195.
- [2] Shi J., Zhang S., Zhen M. M., Deng Q. C., Zheng C., Jing L., Huang F. H. (2017). A novel fluorometric turn-on assay for lipase activity based on an aggregation-induced emission (AIE) luminogen. *Sens. Actuator B Chem.* 238 765-771.
- [3] Guan, P., Liu, Y., Yang, B., Wu, Y., Chai, J., Wen, G., & Liu, B. (2021). Fluorometric probe for the lipase level: Design, mechanism and biological imaging application. *Talanta*, 225, 121948.

- [4] Ivanov Sergey A., Nomura K., Malfanov Ilya L., Sklyar Ilya V., Ptitsyn Leonid R. (2011). Isolation of a novel catechin from *Bergenia* rhizomes that has pronounced lipase-inhibiting and antioxidative properties. *Fitoterapia*, 82(2), 212-8.
- [5] Hu, Q., Tian, Z., Wang, H., Huang, J., Wang, F., Zhao, B., He, R., Jin, Q., Hou, X., Hou, J., Fang, S., Wang, P., & Ge, G. (2021). Rational design and development of a novel and highly specific near-infrared fluorogenic substrate for sensing and imaging of human pancreatic lipase in living systems. *Sensors and Actuators B-chemical*, 341, 130033.
